# Supplementary material
Source: PubMed Central journal article supplement (PMC2669353)
Supplement: 0812401106_0812401106SI.pdf [file 0812401106_0812401106SI.pdf]

# Supporting Information

Wang et al. 10.1073/pnas.0812401106

Table S1. Similar location of melanomas with or without *PTEN* mutations in XP patients

| Melanomas               | Scalp + face | Shoulder + back + abd | Upper extremity | Lower extremity | Total |
|-------------------------|--------------|-----------------------|-----------------|-----------------|-------|
| With <i>PTEN</i> mut    |              |                       |                 |                 |       |
| Number                  | 6            | 6                     | 3               | 18              | 33    |
| % of mutated            | 18%          | 18%                   | 9%              | 55%             | 100%  |
| % of total              | 10%          | 10%                   | 5%              | 31%             | 56%   |
| Without <i>PTEN</i> mut |              |                       |                 |                 |       |
| Number                  | 5            | 3                     | 4               | 14              | 26    |
| % of not mutated        | 19%          | 12%                   | 15%             | 54%             | 100%  |
| % of total              | 8%           | 5%                    | 7%              | 24%             | 44%   |
| All                     |              |                       |                 |                 |       |
| Number                  | 11           | 9                     | 7               | 32              | 59    |
| % of total              | 19%          | 15%                   | 12%             | 54%             | 100%  |

**Table S2. High frequency of XP melanomas with multiple PTEN mutations**

| Melanomas          | Number of <i>PTEN</i> mutations per melanoma |         |         |        | Total number of melanomas |
|--------------------|----------------------------------------------|---------|---------|--------|---------------------------|
|                    | 1                                            | 2       | 3       | 4      |                           |
| All melanomas      | 19 (58%)                                     | 8 (24%) | 5 (15%) | 1 (3%) | 33 (100%)                 |
| Invasive melanomas | 3 (50%)                                      | 1 (17%) | 2 (33%) | 0 (0%) | 6 (100%)                  |
